# Supplementary material
Source: publisher figshare collection journal article supplement (https://gsajournals.figshare.com/ndownloader/files/20411298)
Supplement: Supplementary file 1 [file 20411298]

## Sheet: CTRL-KD vs Spen-KD MYD Buoyancy
Within each row, compare columns (simple effects within rows)
Number of families	7
Number of comparisons per family	10
Alpha	0.05
Tukey's multiple comparisons test	Mean Diff.	95.00% CI of diff.	Significant?	Summary	Adjusted P Value
8.78 % sucrose weight/volume
UAS-spen-RNAi/W1118 vs. cg-Gal4>UAS-spen-RNAi	-13.26	-25.41 to -1.108	Yes	*	0.025
UAS-spen-RNAi/W1118 vs. UAS-W-RNAi/W1118	0.3454	-11.81 to 12.50	No	ns	>0.9999
UAS-spen-RNAi/W1118 vs. cg-Gal4>UAS-W-RNAi	-1.798	-13.95 to 10.36	No	ns	0.9941
UAS-spen-RNAi/W1118 vs. cg-Gal4/W1118	1.357	-10.80 to 13.51	No	ns	0.998
cg-Gal4>UAS-spen-RNAi vs. UAS-W-RNAi/W1118	13.61	1.454 to 25.76	Yes	*	0.0199
cg-Gal4>UAS-spen-RNAi vs. cg-Gal4>UAS-W-RNAi	11.46	-0.6893 to 23.62	No	ns	0.0746
cg-Gal4>UAS-spen-RNAi vs. cg-Gal4/W1118	14.62	2.465 to 26.77	Yes	**	0.0098
UAS-W-RNAi/W1118 vs. cg-Gal4>UAS-W-RNAi	-2.143	-14.30 to 10.01	No	ns	0.9884
UAS-W-RNAi/W1118 vs. cg-Gal4/W1118	1.011	-11.14 to 13.16	No	ns	0.9994
cg-Gal4>UAS-W-RNAi vs. cg-Gal4/W1118	3.155	-8.999 to 15.31	No	ns	0.9522
9.3 % sucrose weight/volume
UAS-spen-RNAi/W1118 vs. cg-Gal4>UAS-spen-RNAi	-34.67	-46.82 to -22.52	Yes	****	<0.0001
UAS-spen-RNAi/W1118 vs. UAS-W-RNAi/W1118	2.922	-9.231 to 15.08	No	ns	0.9636
UAS-spen-RNAi/W1118 vs. cg-Gal4>UAS-W-RNAi	-1.479	-13.63 to 10.67	No	ns	0.9972
UAS-spen-RNAi/W1118 vs. cg-Gal4/W1118	5.207	-6.947 to 17.36	No	ns	0.7605
cg-Gal4>UAS-spen-RNAi vs. UAS-W-RNAi/W1118	37.59	25.44 to 49.74	Yes	****	<0.0001
cg-Gal4>UAS-spen-RNAi vs. cg-Gal4>UAS-W-RNAi	33.19	21.04 to 45.34	Yes	****	<0.0001
cg-Gal4>UAS-spen-RNAi vs. cg-Gal4/W1118	39.88	27.72 to 52.03	Yes	****	<0.0001
UAS-W-RNAi/W1118 vs. cg-Gal4>UAS-W-RNAi	-4.401	-16.55 to 7.752	No	ns	0.8546
UAS-W-RNAi/W1118 vs. cg-Gal4/W1118	2.285	-9.869 to 14.44	No	ns	0.9853
cg-Gal4>UAS-W-RNAi vs. cg-Gal4/W1118	6.686	-5.468 to 18.84	No	ns	0.5511
9.78 % sucrose weight/volume
UAS-spen-RNAi/W1118 vs. cg-Gal4>UAS-spen-RNAi	-32.39	-44.54 to -20.23	Yes	****	<0.0001
UAS-spen-RNAi/W1118 vs. UAS-W-RNAi/W1118	2.402	-9.751 to 14.55	No	ns	0.9822
UAS-spen-RNAi/W1118 vs. cg-Gal4>UAS-W-RNAi	4.791	-7.363 to 16.94	No	ns	0.8118
UAS-spen-RNAi/W1118 vs. cg-Gal4/W1118	16.81	4.653 to 28.96	Yes	**	0.0018
cg-Gal4>UAS-spen-RNAi vs. UAS-W-RNAi/W1118	34.79	22.63 to 46.94	Yes	****	<0.0001
cg-Gal4>UAS-spen-RNAi vs. cg-Gal4>UAS-W-RNAi	37.18	25.02 to 49.33	Yes	****	<0.0001
cg-Gal4>UAS-spen-RNAi vs. cg-Gal4/W1118	49.19	37.04 to 61.34	Yes	****	<0.0001
UAS-W-RNAi/W1118 vs. cg-Gal4>UAS-W-RNAi	2.389	-9.764 to 14.54	No	ns	0.9826
UAS-W-RNAi/W1118 vs. cg-Gal4/W1118	14.4	2.251 to 26.56	Yes	*	0.0114
cg-Gal4>UAS-W-RNAi vs. cg-Gal4/W1118	12.02	-0.1378 to 24.17	No	ns	0.0543
10.2 % sucrose weight/volume
UAS-spen-RNAi/W1118 vs. cg-Gal4>UAS-spen-RNAi	-8.929	-21.08 to 3.224	No	ns	0.257
UAS-spen-RNAi/W1118 vs. UAS-W-RNAi/W1118	-2.91	-15.06 to 9.243	No	ns	0.9642
UAS-spen-RNAi/W1118 vs. cg-Gal4>UAS-W-RNAi	6.544	-5.609 to 18.70	No	ns	0.5719
UAS-spen-RNAi/W1118 vs. cg-Gal4/W1118	16.24	4.082 to 28.39	Yes	**	0.0029
cg-Gal4>UAS-spen-RNAi vs. UAS-W-RNAi/W1118	6.02	-6.134 to 18.17	No	ns	0.6485
cg-Gal4>UAS-spen-RNAi vs. cg-Gal4>UAS-W-RNAi	15.47	3.320 to 27.63	Yes	**	0.0052
cg-Gal4>UAS-spen-RNAi vs. cg-Gal4/W1118	25.16	13.01 to 37.32	Yes	****	<0.0001
UAS-W-RNAi/W1118 vs. cg-Gal4>UAS-W-RNAi	9.454	-2.700 to 21.61	No	ns	0.2053
UAS-W-RNAi/W1118 vs. cg-Gal4/W1118	19.15	6.992 to 31.30	Yes	***	0.0002
cg-Gal4>UAS-W-RNAi vs. cg-Gal4/W1118	9.691	-2.462 to 21.84	No	ns	0.1844
10.61 % sucrose weight/volume
UAS-spen-RNAi/W1118 vs. cg-Gal4>UAS-spen-RNAi	-1.295	-13.45 to 10.86	No	ns	0.9983
UAS-spen-RNAi/W1118 vs. UAS-W-RNAi/W1118	-0.9615	-13.11 to 11.19	No	ns	0.9995
UAS-spen-RNAi/W1118 vs. cg-Gal4>UAS-W-RNAi	1.498	-10.66 to 13.65	No	ns	0.9971
UAS-spen-RNAi/W1118 vs. cg-Gal4/W1118	1.802	-10.35 to 13.96	No	ns	0.994
cg-Gal4>UAS-spen-RNAi vs. UAS-W-RNAi/W1118	0.3333	-11.82 to 12.49	No	ns	>0.9999
cg-Gal4>UAS-spen-RNAi vs. cg-Gal4>UAS-W-RNAi	2.793	-9.361 to 14.95	No	ns	0.9691
cg-Gal4>UAS-spen-RNAi vs. cg-Gal4/W1118	3.097	-9.056 to 15.25	No	ns	0.9552
UAS-W-RNAi/W1118 vs. cg-Gal4>UAS-W-RNAi	2.459	-9.694 to 14.61	No	ns	0.9806
UAS-W-RNAi/W1118 vs. cg-Gal4/W1118	2.764	-9.389 to 14.92	No	ns	0.9702
cg-Gal4>UAS-W-RNAi vs. cg-Gal4/W1118	0.3047	-11.85 to 12.46	No	ns	>0.9999
10.98 % sucrose weight/volume
UAS-spen-RNAi/W1118 vs. cg-Gal4>UAS-spen-RNAi	0	-12.15 to 12.15	No	ns	>0.9999
UAS-spen-RNAi/W1118 vs. UAS-W-RNAi/W1118	0	-12.15 to 12.15	No	ns	>0.9999
UAS-spen-RNAi/W1118 vs. cg-Gal4>UAS-W-RNAi	0.3472	-11.81 to 12.50	No	ns	>0.9999
UAS-spen-RNAi/W1118 vs. cg-Gal4/W1118	0.6944	-11.46 to 12.85	No	ns	0.9999
cg-Gal4>UAS-spen-RNAi vs. UAS-W-RNAi/W1118	0	-12.15 to 12.15	No	ns	>0.9999
cg-Gal4>UAS-spen-RNAi vs. cg-Gal4>UAS-W-RNAi	0.3472	-11.81 to 12.50	No	ns	>0.9999
cg-Gal4>UAS-spen-RNAi vs. cg-Gal4/W1118	0.6944	-11.46 to 12.85	No	ns	0.9999
UAS-W-RNAi/W1118 vs. cg-Gal4>UAS-W-RNAi	0.3472	-11.81 to 12.50	No	ns	>0.9999
UAS-W-RNAi/W1118 vs. cg-Gal4/W1118	0.6944	-11.46 to 12.85	No	ns	0.9999
cg-Gal4>UAS-W-RNAi vs. cg-Gal4/W1118	0.3472	-11.81 to 12.50	No	ns	>0.9999
11.32 % sucrose weight/volume
UAS-spen-RNAi/W1118 vs. cg-Gal4>UAS-spen-RNAi	0	-12.15 to 12.15	No	ns	>0.9999
UAS-spen-RNAi/W1118 vs. UAS-W-RNAi/W1118	0	-12.15 to 12.15	No	ns	>0.9999
UAS-spen-RNAi/W1118 vs. cg-Gal4>UAS-W-RNAi	0	-12.15 to 12.15	No	ns	>0.9999
UAS-spen-RNAi/W1118 vs. cg-Gal4/W1118	0	-12.15 to 12.15	No	ns	>0.9999
cg-Gal4>UAS-spen-RNAi vs. UAS-W-RNAi/W1118	0	-12.15 to 12.15	No	ns	>0.9999
cg-Gal4>UAS-spen-RNAi vs. cg-Gal4>UAS-W-RNAi	0	-12.15 to 12.15	No	ns	>0.9999
cg-Gal4>UAS-spen-RNAi vs. cg-Gal4/W1118	0	-12.15 to 12.15	No	ns	>0.9999
UAS-W-RNAi/W1118 vs. cg-Gal4>UAS-W-RNAi	0	-12.15 to 12.15	No	ns	>0.9999
UAS-W-RNAi/W1118 vs. cg-Gal4/W1118	0	-12.15 to 12.15	No	ns	>0.9999
cg-Gal4>UAS-W-RNAi vs. cg-Gal4/W1118	0	-12.15 to 12.15	No	ns	>0.9999
Test details	Mean 1	Mean 2	Mean Diff.	SE of diff.	N1	N2	q	DF
8.78 % sucrose weight/volume
UAS-spen-RNAi/W1118 vs. cg-Gal4>UAS-spen-RNAi	2.384	15.65	-13.26	4.398	6	6	4.265	140
UAS-spen-RNAi/W1118 vs. UAS-W-RNAi/W1118	2.384	2.039	0.3454	4.398	6	6	0.1111	140
UAS-spen-RNAi/W1118 vs. cg-Gal4>UAS-W-RNAi	2.384	4.182	-1.798	4.398	6	6	0.5781	140
UAS-spen-RNAi/W1118 vs. cg-Gal4/W1118	2.384	1.027	1.357	4.398	6	6	0.4364	140
cg-Gal4>UAS-spen-RNAi vs. UAS-W-RNAi/W1118	15.65	2.039	13.61	4.398	6	6	4.376	140
cg-Gal4>UAS-spen-RNAi vs. cg-Gal4>UAS-W-RNAi	15.65	4.182	11.46	4.398	6	6	3.687	140
cg-Gal4>UAS-spen-RNAi vs. cg-Gal4/W1118	15.65	1.027	14.62	4.398	6	6	4.701	140
UAS-W-RNAi/W1118 vs. cg-Gal4>UAS-W-RNAi	2.039	4.182	-2.143	4.398	6	6	0.6892	140
UAS-W-RNAi/W1118 vs. cg-Gal4/W1118	2.039	1.027	1.011	4.398	6	6	0.3253	140
cg-Gal4>UAS-W-RNAi vs. cg-Gal4/W1118	4.182	1.027	3.155	4.398	6	6	1.014	140
9.3 % sucrose weight/volume
UAS-spen-RNAi/W1118 vs. cg-Gal4>UAS-spen-RNAi	16.94	51.61	-34.67	4.398	6	6	11.15	140
UAS-spen-RNAi/W1118 vs. UAS-W-RNAi/W1118	16.94	14.02	2.922	4.398	6	6	0.9397	140
UAS-spen-RNAi/W1118 vs. cg-Gal4>UAS-W-RNAi	16.94	18.42	-1.479	4.398	6	6	0.4756	140
UAS-spen-RNAi/W1118 vs. cg-Gal4/W1118	16.94	11.74	5.207	4.398	6	6	1.674	140
cg-Gal4>UAS-spen-RNAi vs. UAS-W-RNAi/W1118	51.61	14.02	37.59	4.398	6	6	12.09	140
cg-Gal4>UAS-spen-RNAi vs. cg-Gal4>UAS-W-RNAi	51.61	18.42	33.19	4.398	6	6	10.67	140
cg-Gal4>UAS-spen-RNAi vs. cg-Gal4/W1118	51.61	11.74	39.88	4.398	6	6	12.82	140
UAS-W-RNAi/W1118 vs. cg-Gal4>UAS-W-RNAi	14.02	18.42	-4.401	4.398	6	6	1.415	140
UAS-W-RNAi/W1118 vs. cg-Gal4/W1118	14.02	11.74	2.285	4.398	6	6	0.7347	140
cg-Gal4>UAS-W-RNAi vs. cg-Gal4/W1118	18.42	11.74	6.686	4.398	6	6	2.15	140
9.78 % sucrose weight/volume
UAS-spen-RNAi/W1118 vs. cg-Gal4>UAS-spen-RNAi	53.14	85.52	-32.39	4.398	6	6	10.42	140
UAS-spen-RNAi/W1118 vs. UAS-W-RNAi/W1118	53.14	50.74	2.402	4.398	6	6	0.7724	140
UAS-spen-RNAi/W1118 vs. cg-Gal4>UAS-W-RNAi	53.14	48.35	4.791	4.398	6	6	1.541	140
UAS-spen-RNAi/W1118 vs. cg-Gal4/W1118	53.14	36.33	16.81	4.398	6	6	5.405	140
cg-Gal4>UAS-spen-RNAi vs. UAS-W-RNAi/W1118	85.52	50.74	34.79	4.398	6	6	11.19	140
cg-Gal4>UAS-spen-RNAi vs. cg-Gal4>UAS-W-RNAi	85.52	48.35	37.18	4.398	6	6	11.96	140
cg-Gal4>UAS-spen-RNAi vs. cg-Gal4/W1118	85.52	36.33	49.19	4.398	6	6	15.82	140
UAS-W-RNAi/W1118 vs. cg-Gal4>UAS-W-RNAi	50.74	48.35	2.389	4.398	6	6	0.7682	140
UAS-W-RNAi/W1118 vs. cg-Gal4/W1118	50.74	36.33	14.4	4.398	6	6	4.632	140
cg-Gal4>UAS-W-RNAi vs. cg-Gal4/W1118	48.35	36.33	12.02	4.398	6	6	3.864	140
10.2 % sucrose weight/volume
UAS-spen-RNAi/W1118 vs. cg-Gal4>UAS-spen-RNAi	90.09	99.02	-8.929	4.398	6	6	2.872	140
UAS-spen-RNAi/W1118 vs. UAS-W-RNAi/W1118	90.09	93	-2.91	4.398	6	6	0.9357	140
UAS-spen-RNAi/W1118 vs. cg-Gal4>UAS-W-RNAi	90.09	83.55	6.544	4.398	6	6	2.104	140
UAS-spen-RNAi/W1118 vs. cg-Gal4/W1118	90.09	73.85	16.24	4.398	6	6	5.221	140
cg-Gal4>UAS-spen-RNAi vs. UAS-W-RNAi/W1118	99.02	93	6.02	4.398	6	6	1.936	140
cg-Gal4>UAS-spen-RNAi vs. cg-Gal4>UAS-W-RNAi	99.02	83.55	15.47	4.398	6	6	4.976	140
cg-Gal4>UAS-spen-RNAi vs. cg-Gal4/W1118	99.02	73.85	25.16	4.398	6	6	8.093	140
UAS-W-RNAi/W1118 vs. cg-Gal4>UAS-W-RNAi	93	83.55	9.454	4.398	6	6	3.04	140
UAS-W-RNAi/W1118 vs. cg-Gal4/W1118	93	73.85	19.15	4.398	6	6	6.157	140
cg-Gal4>UAS-W-RNAi vs. cg-Gal4/W1118	83.55	73.85	9.691	4.398	6	6	3.117	140
10.61 % sucrose weight/volume
UAS-spen-RNAi/W1118 vs. cg-Gal4>UAS-spen-RNAi	98.71	100	-1.295	4.398	6	6	0.4164	140
UAS-spen-RNAi/W1118 vs. UAS-W-RNAi/W1118	98.71	99.67	-0.9615	4.398	6	6	0.3092	140
UAS-spen-RNAi/W1118 vs. cg-Gal4>UAS-W-RNAi	98.71	97.21	1.498	4.398	6	6	0.4816	140
UAS-spen-RNAi/W1118 vs. cg-Gal4/W1118	98.71	96.9	1.802	4.398	6	6	0.5796	140
cg-Gal4>UAS-spen-RNAi vs. UAS-W-RNAi/W1118	100	99.67	0.3333	4.398	6	6	0.1072	140
cg-Gal4>UAS-spen-RNAi vs. cg-Gal4>UAS-W-RNAi	100	97.21	2.793	4.398	6	6	0.8981	140
cg-Gal4>UAS-spen-RNAi vs. cg-Gal4/W1118	100	96.9	3.097	4.398	6	6	0.996	140
UAS-W-RNAi/W1118 vs. cg-Gal4>UAS-W-RNAi	99.67	97.21	2.459	4.398	6	6	0.7909	140
UAS-W-RNAi/W1118 vs. cg-Gal4/W1118	99.67	96.9	2.764	4.398	6	6	0.8889	140
cg-Gal4>UAS-W-RNAi vs. cg-Gal4/W1118	97.21	96.9	0.3047	4.398	6	6	0.09798	140
10.98 % sucrose weight/volume
UAS-spen-RNAi/W1118 vs. cg-Gal4>UAS-spen-RNAi	100	100	0	4.398	6	6	0	140
UAS-spen-RNAi/W1118 vs. UAS-W-RNAi/W1118	100	100	0	4.398	6	6	0	140
UAS-spen-RNAi/W1118 vs. cg-Gal4>UAS-W-RNAi	100	99.65	0.3472	4.398	6	6	0.1117	140
UAS-spen-RNAi/W1118 vs. cg-Gal4/W1118	100	99.31	0.6944	4.398	6	6	0.2233	140
cg-Gal4>UAS-spen-RNAi vs. UAS-W-RNAi/W1118	100	100	0	4.398	6	6	0	140
cg-Gal4>UAS-spen-RNAi vs. cg-Gal4>UAS-W-RNAi	100	99.65	0.3472	4.398	6	6	0.1117	140
cg-Gal4>UAS-spen-RNAi vs. cg-Gal4/W1118	100	99.31	0.6944	4.398	6	6	0.2233	140
UAS-W-RNAi/W1118 vs. cg-Gal4>UAS-W-RNAi	100	99.65	0.3472	4.398	6	6	0.1117	140
UAS-W-RNAi/W1118 vs. cg-Gal4/W1118	100	99.31	0.6944	4.398	6	6	0.2233	140
cg-Gal4>UAS-W-RNAi vs. cg-Gal4/W1118	99.65	99.31	0.3472	4.398	6	6	0.1117	140
11.32 % sucrose weight/volume
UAS-spen-RNAi/W1118 vs. cg-Gal4>UAS-spen-RNAi	100	100	0	4.398	6	6	0	140
UAS-spen-RNAi/W1118 vs. UAS-W-RNAi/W1118	100	100	0	4.398	6	6	0	140
UAS-spen-RNAi/W1118 vs. cg-Gal4>UAS-W-RNAi	100	100	0	4.398	6	6	0	140
UAS-spen-RNAi/W1118 vs. cg-Gal4/W1118	100	100	0	4.398	6	6	0	140
cg-Gal4>UAS-spen-RNAi vs. UAS-W-RNAi/W1118	100	100	0	4.398	6	6	0	140
cg-Gal4>UAS-spen-RNAi vs. cg-Gal4>UAS-W-RNAi	100	100	0	4.398	6	6	0	140
cg-Gal4>UAS-spen-RNAi vs. cg-Gal4/W1118	100	100	0	4.398	6	6	0	140
UAS-W-RNAi/W1118 vs. cg-Gal4>UAS-W-RNAi	100	100	0	4.398	6	6	0	140
UAS-W-RNAi/W1118 vs. cg-Gal4/W1118	100	100	0	4.398	6	6	0	140
cg-Gal4>UAS-W-RNAi vs. cg-Gal4/W1118	100	100	0	4.398	6	6	0	140

## Sheet: CTRL-KD vs Spen-KD HYD Buoyancy
Within each row, compare columns (simple effects within rows)
Number of families	7
Number of comparisons per family	10
Alpha	0.05
Tukey's multiple comparisons test	Mean Diff.	95.00% CI of diff.	Significant?	Summary	Adjusted P Value
8.78 % sucrose weight/volume
UAS-spen-RNAi/W1118 vs. cg-Gal4>UAS-spen-RNAi	-20.49	-33.39 to -7.590	Yes	***	0.0002
UAS-spen-RNAi/W1118 vs. UAS-W-RNAi/W1118	-1.028	-13.93 to 11.87	No	ns	0.9995
UAS-spen-RNAi/W1118 vs. cg-Gal4>UAS-W-RNAi	-3.579	-16.48 to 9.320	No	ns	0.9397
UAS-spen-RNAi/W1118 vs. cg-Gal4/W1118	-2.019	-14.92 to 10.88	No	ns	0.9926
cg-Gal4>UAS-spen-RNAi vs. UAS-W-RNAi/W1118	19.46	6.562 to 32.36	Yes	***	0.0005
cg-Gal4>UAS-spen-RNAi vs. cg-Gal4>UAS-W-RNAi	16.91	4.011 to 29.81	Yes	**	0.0037
cg-Gal4>UAS-spen-RNAi vs. cg-Gal4/W1118	18.47	5.571 to 31.37	Yes	**	0.0011
UAS-W-RNAi/W1118 vs. cg-Gal4>UAS-W-RNAi	-2.551	-15.45 to 10.35	No	ns	0.9822
UAS-W-RNAi/W1118 vs. cg-Gal4/W1118	-0.9907	-13.89 to 11.91	No	ns	0.9995
cg-Gal4>UAS-W-RNAi vs. cg-Gal4/W1118	1.56	-11.34 to 14.46	No	ns	0.9973
9.3 % sucrose weight/volume
UAS-spen-RNAi/W1118 vs. cg-Gal4>UAS-spen-RNAi	-26.38	-39.28 to -13.48	Yes	****	<0.0001
UAS-spen-RNAi/W1118 vs. UAS-W-RNAi/W1118	-1.534	-14.43 to 11.37	No	ns	0.9975
UAS-spen-RNAi/W1118 vs. cg-Gal4>UAS-W-RNAi	-5.308	-18.21 to 7.592	No	ns	0.7865
UAS-spen-RNAi/W1118 vs. cg-Gal4/W1118	11.59	-1.312 to 24.49	No	ns	0.1005
cg-Gal4>UAS-spen-RNAi vs. UAS-W-RNAi/W1118	24.85	11.95 to 37.75	Yes	****	<0.0001
cg-Gal4>UAS-spen-RNAi vs. cg-Gal4>UAS-W-RNAi	21.07	8.173 to 33.97	Yes	***	0.0001
cg-Gal4>UAS-spen-RNAi vs. cg-Gal4/W1118	37.97	25.07 to 50.87	Yes	****	<0.0001
UAS-W-RNAi/W1118 vs. cg-Gal4>UAS-W-RNAi	-3.774	-16.67 to 9.125	No	ns	0.9276
UAS-W-RNAi/W1118 vs. cg-Gal4/W1118	13.12	0.2219 to 26.02	Yes	*	0.0441
cg-Gal4>UAS-W-RNAi vs. cg-Gal4/W1118	16.9	3.996 to 29.79	Yes	**	0.0037
9.78 % sucrose weight/volume
UAS-spen-RNAi/W1118 vs. cg-Gal4>UAS-spen-RNAi	-18.74	-31.63 to -5.836	Yes	***	0.0009
UAS-spen-RNAi/W1118 vs. UAS-W-RNAi/W1118	-11.08	-23.97 to 1.824	No	ns	0.1289
UAS-spen-RNAi/W1118 vs. cg-Gal4>UAS-W-RNAi	6.206	-6.693 to 19.11	No	ns	0.6732
UAS-spen-RNAi/W1118 vs. cg-Gal4/W1118	11.89	-1.006 to 24.79	No	ns	0.086
cg-Gal4>UAS-spen-RNAi vs. UAS-W-RNAi/W1118	7.66	-5.239 to 20.56	No	ns	0.4739
cg-Gal4>UAS-spen-RNAi vs. cg-Gal4>UAS-W-RNAi	24.94	12.04 to 37.84	Yes	****	<0.0001
cg-Gal4>UAS-spen-RNAi vs. cg-Gal4/W1118	30.63	17.73 to 43.53	Yes	****	<0.0001
UAS-W-RNAi/W1118 vs. cg-Gal4>UAS-W-RNAi	17.28	4.382 to 30.18	Yes	**	0.0028
UAS-W-RNAi/W1118 vs. cg-Gal4/W1118	22.97	10.07 to 35.87	Yes	****	<0.0001
cg-Gal4>UAS-W-RNAi vs. cg-Gal4/W1118	5.687	-7.212 to 18.59	No	ns	0.7407
10.2 % sucrose weight/volume
UAS-spen-RNAi/W1118 vs. cg-Gal4>UAS-spen-RNAi	-5.215	-18.11 to 7.685	No	ns	0.7972
UAS-spen-RNAi/W1118 vs. UAS-W-RNAi/W1118	-6.884	-19.78 to 6.016	No	ns	0.5805
UAS-spen-RNAi/W1118 vs. cg-Gal4>UAS-W-RNAi	8.12	-4.780 to 21.02	No	ns	0.4133
UAS-spen-RNAi/W1118 vs. cg-Gal4/W1118	20.63	7.728 to 33.53	Yes	***	0.0002
cg-Gal4>UAS-spen-RNAi vs. UAS-W-RNAi/W1118	-1.669	-14.57 to 11.23	No	ns	0.9965
cg-Gal4>UAS-spen-RNAi vs. cg-Gal4>UAS-W-RNAi	13.33	0.4351 to 26.23	Yes	*	0.039
cg-Gal4>UAS-spen-RNAi vs. cg-Gal4/W1118	25.84	12.94 to 38.74	Yes	****	<0.0001
UAS-W-RNAi/W1118 vs. cg-Gal4>UAS-W-RNAi	15	2.104 to 27.90	Yes	*	0.0138
UAS-W-RNAi/W1118 vs. cg-Gal4/W1118	27.51	14.61 to 40.41	Yes	****	<0.0001
cg-Gal4>UAS-W-RNAi vs. cg-Gal4/W1118	12.51	-0.3915 to 25.41	No	ns	0.0621
10.61 % sucrose weight/volume
UAS-spen-RNAi/W1118 vs. cg-Gal4>UAS-spen-RNAi	-0.6944	-13.59 to 12.20	No	ns	0.9999
UAS-spen-RNAi/W1118 vs. UAS-W-RNAi/W1118	0.01478	-12.88 to 12.91	No	ns	>0.9999
UAS-spen-RNAi/W1118 vs. cg-Gal4>UAS-W-RNAi	3.257	-9.643 to 16.16	No	ns	0.9567
UAS-spen-RNAi/W1118 vs. cg-Gal4/W1118	8.339	-4.560 to 21.24	No	ns	0.3855
cg-Gal4>UAS-spen-RNAi vs. UAS-W-RNAi/W1118	0.7092	-12.19 to 13.61	No	ns	0.9999
cg-Gal4>UAS-spen-RNAi vs. cg-Gal4>UAS-W-RNAi	3.951	-8.948 to 16.85	No	ns	0.9155
cg-Gal4>UAS-spen-RNAi vs. cg-Gal4/W1118	9.033	-3.866 to 21.93	No	ns	0.3036
UAS-W-RNAi/W1118 vs. cg-Gal4>UAS-W-RNAi	3.242	-9.657 to 16.14	No	ns	0.9574
UAS-W-RNAi/W1118 vs. cg-Gal4/W1118	8.324	-4.575 to 21.22	No	ns	0.3873
cg-Gal4>UAS-W-RNAi vs. cg-Gal4/W1118	5.082	-7.817 to 17.98	No	ns	0.812
10.98 % sucrose weight/volume
UAS-spen-RNAi/W1118 vs. cg-Gal4>UAS-spen-RNAi	0	-12.90 to 12.90	No	ns	>0.9999
UAS-spen-RNAi/W1118 vs. UAS-W-RNAi/W1118	0	-12.90 to 12.90	No	ns	>0.9999
UAS-spen-RNAi/W1118 vs. cg-Gal4>UAS-W-RNAi	0	-12.90 to 12.90	No	ns	>0.9999
UAS-spen-RNAi/W1118 vs. cg-Gal4/W1118	0	-12.90 to 12.90	No	ns	>0.9999
cg-Gal4>UAS-spen-RNAi vs. UAS-W-RNAi/W1118	0	-12.90 to 12.90	No	ns	>0.9999
cg-Gal4>UAS-spen-RNAi vs. cg-Gal4>UAS-W-RNAi	0	-12.90 to 12.90	No	ns	>0.9999
cg-Gal4>UAS-spen-RNAi vs. cg-Gal4/W1118	0	-12.90 to 12.90	No	ns	>0.9999
UAS-W-RNAi/W1118 vs. cg-Gal4>UAS-W-RNAi	0	-12.90 to 12.90	No	ns	>0.9999
UAS-W-RNAi/W1118 vs. cg-Gal4/W1118	0	-12.90 to 12.90	No	ns	>0.9999
cg-Gal4>UAS-W-RNAi vs. cg-Gal4/W1118	0	-12.90 to 12.90	No	ns	>0.9999
11.32 % sucrose weight/volume
UAS-spen-RNAi/W1118 vs. cg-Gal4>UAS-spen-RNAi	0	-12.90 to 12.90	No	ns	>0.9999
UAS-spen-RNAi/W1118 vs. UAS-W-RNAi/W1118	0	-12.90 to 12.90	No	ns	>0.9999
UAS-spen-RNAi/W1118 vs. cg-Gal4>UAS-W-RNAi	0	-12.90 to 12.90	No	ns	>0.9999
UAS-spen-RNAi/W1118 vs. cg-Gal4/W1118	0	-12.90 to 12.90	No	ns	>0.9999
cg-Gal4>UAS-spen-RNAi vs. UAS-W-RNAi/W1118	0	-12.90 to 12.90	No	ns	>0.9999
cg-Gal4>UAS-spen-RNAi vs. cg-Gal4>UAS-W-RNAi	0	-12.90 to 12.90	No	ns	>0.9999
cg-Gal4>UAS-spen-RNAi vs. cg-Gal4/W1118	0	-12.90 to 12.90	No	ns	>0.9999
UAS-W-RNAi/W1118 vs. cg-Gal4>UAS-W-RNAi	0	-12.90 to 12.90	No	ns	>0.9999
UAS-W-RNAi/W1118 vs. cg-Gal4/W1118	0	-12.90 to 12.90	No	ns	>0.9999
cg-Gal4>UAS-W-RNAi vs. cg-Gal4/W1118	0	-12.90 to 12.90	No	ns	>0.9999
Test details	Mean 1	Mean 2	Mean Diff.	SE of diff.	N1	N2	q	DF
8.78 % sucrose weight/volume
UAS-spen-RNAi/W1118 vs. cg-Gal4>UAS-spen-RNAi	0.6891	21.18	-20.49	4.667	6	6	6.208	140
UAS-spen-RNAi/W1118 vs. UAS-W-RNAi/W1118	0.6891	1.717	-1.028	4.667	6	6	0.3116	140
UAS-spen-RNAi/W1118 vs. cg-Gal4>UAS-W-RNAi	0.6891	4.268	-3.579	4.667	6	6	1.085	140
UAS-spen-RNAi/W1118 vs. cg-Gal4/W1118	0.6891	2.708	-2.019	4.667	6	6	0.6117	140
cg-Gal4>UAS-spen-RNAi vs. UAS-W-RNAi/W1118	21.18	1.717	19.46	4.667	6	6	5.897	140
cg-Gal4>UAS-spen-RNAi vs. cg-Gal4>UAS-W-RNAi	21.18	4.268	16.91	4.667	6	6	5.124	140
cg-Gal4>UAS-spen-RNAi vs. cg-Gal4/W1118	21.18	2.708	18.47	4.667	6	6	5.596	140
UAS-W-RNAi/W1118 vs. cg-Gal4>UAS-W-RNAi	1.717	4.268	-2.551	4.667	6	6	0.7729	140
UAS-W-RNAi/W1118 vs. cg-Gal4/W1118	1.717	2.708	-0.9907	4.667	6	6	0.3002	140
cg-Gal4>UAS-W-RNAi vs. cg-Gal4/W1118	4.268	2.708	1.56	4.667	6	6	0.4728	140
9.3 % sucrose weight/volume
UAS-spen-RNAi/W1118 vs. cg-Gal4>UAS-spen-RNAi	21.95	48.33	-26.38	4.667	6	6	7.993	140
UAS-spen-RNAi/W1118 vs. UAS-W-RNAi/W1118	21.95	23.49	-1.534	4.667	6	6	0.4647	140
UAS-spen-RNAi/W1118 vs. cg-Gal4>UAS-W-RNAi	21.95	27.26	-5.308	4.667	6	6	1.608	140
UAS-spen-RNAi/W1118 vs. cg-Gal4/W1118	21.95	10.37	11.59	4.667	6	6	3.511	140
cg-Gal4>UAS-spen-RNAi vs. UAS-W-RNAi/W1118	48.33	23.49	24.85	4.667	6	6	7.528	140
cg-Gal4>UAS-spen-RNAi vs. cg-Gal4>UAS-W-RNAi	48.33	27.26	21.07	4.667	6	6	6.385	140
cg-Gal4>UAS-spen-RNAi vs. cg-Gal4/W1118	48.33	10.37	37.97	4.667	6	6	11.5	140
UAS-W-RNAi/W1118 vs. cg-Gal4>UAS-W-RNAi	23.49	27.26	-3.774	4.667	6	6	1.144	140
UAS-W-RNAi/W1118 vs. cg-Gal4/W1118	23.49	10.37	13.12	4.667	6	6	3.976	140
cg-Gal4>UAS-W-RNAi vs. cg-Gal4/W1118	27.26	10.37	16.9	4.667	6	6	5.119	140
9.78 % sucrose weight/volume
UAS-spen-RNAi/W1118 vs. cg-Gal4>UAS-spen-RNAi	58.3	77.03	-18.74	4.667	6	6	5.677	140
UAS-spen-RNAi/W1118 vs. UAS-W-RNAi/W1118	58.3	69.37	-11.08	4.667	6	6	3.356	140
UAS-spen-RNAi/W1118 vs. cg-Gal4>UAS-W-RNAi	58.3	52.09	6.206	4.667	6	6	1.881	140
UAS-spen-RNAi/W1118 vs. cg-Gal4/W1118	58.3	46.4	11.89	4.667	6	6	3.604	140
cg-Gal4>UAS-spen-RNAi vs. UAS-W-RNAi/W1118	77.03	69.37	7.66	4.667	6	6	2.321	140
cg-Gal4>UAS-spen-RNAi vs. cg-Gal4>UAS-W-RNAi	77.03	52.09	24.94	4.667	6	6	7.557	140
cg-Gal4>UAS-spen-RNAi vs. cg-Gal4/W1118	77.03	46.4	30.63	4.667	6	6	9.28	140
UAS-W-RNAi/W1118 vs. cg-Gal4>UAS-W-RNAi	69.37	52.09	17.28	4.667	6	6	5.236	140
UAS-W-RNAi/W1118 vs. cg-Gal4/W1118	69.37	46.4	22.97	4.667	6	6	6.959	140
cg-Gal4>UAS-W-RNAi vs. cg-Gal4/W1118	52.09	46.4	5.687	4.667	6	6	1.723	140
10.2 % sucrose weight/volume
UAS-spen-RNAi/W1118 vs. cg-Gal4>UAS-spen-RNAi	87.87	93.09	-5.215	4.667	6	6	1.58	140
UAS-spen-RNAi/W1118 vs. UAS-W-RNAi/W1118	87.87	94.76	-6.884	4.667	6	6	2.086	140
UAS-spen-RNAi/W1118 vs. cg-Gal4>UAS-W-RNAi	87.87	79.75	8.12	4.667	6	6	2.46	140
UAS-spen-RNAi/W1118 vs. cg-Gal4/W1118	87.87	67.25	20.63	4.667	6	6	6.25	140
cg-Gal4>UAS-spen-RNAi vs. UAS-W-RNAi/W1118	93.09	94.76	-1.669	4.667	6	6	0.5057	140
cg-Gal4>UAS-spen-RNAi vs. cg-Gal4>UAS-W-RNAi	93.09	79.75	13.33	4.667	6	6	4.04	140
cg-Gal4>UAS-spen-RNAi vs. cg-Gal4/W1118	93.09	67.25	25.84	4.667	6	6	7.83	140
UAS-W-RNAi/W1118 vs. cg-Gal4>UAS-W-RNAi	94.76	79.75	15	4.667	6	6	4.546	140
UAS-W-RNAi/W1118 vs. cg-Gal4/W1118	94.76	67.25	27.51	4.667	6	6	8.336	140
cg-Gal4>UAS-W-RNAi vs. cg-Gal4/W1118	79.75	67.25	12.51	4.667	6	6	3.79	140
10.61 % sucrose weight/volume
UAS-spen-RNAi/W1118 vs. cg-Gal4>UAS-spen-RNAi	99.31	100	-0.6944	4.667	6	6	0.2104	140
UAS-spen-RNAi/W1118 vs. UAS-W-RNAi/W1118	99.31	99.29	0.01478	4.667	6	6	0.004477	140
UAS-spen-RNAi/W1118 vs. cg-Gal4>UAS-W-RNAi	99.31	96.05	3.257	4.667	6	6	0.9868	140
UAS-spen-RNAi/W1118 vs. cg-Gal4/W1118	99.31	90.97	8.339	4.667	6	6	2.527	140
cg-Gal4>UAS-spen-RNAi vs. UAS-W-RNAi/W1118	100	99.29	0.7092	4.667	6	6	0.2149	140
cg-Gal4>UAS-spen-RNAi vs. cg-Gal4>UAS-W-RNAi	100	96.05	3.951	4.667	6	6	1.197	140
cg-Gal4>UAS-spen-RNAi vs. cg-Gal4/W1118	100	90.97	9.033	4.667	6	6	2.737	140
UAS-W-RNAi/W1118 vs. cg-Gal4>UAS-W-RNAi	99.29	96.05	3.242	4.667	6	6	0.9823	140
UAS-W-RNAi/W1118 vs. cg-Gal4/W1118	99.29	90.97	8.324	4.667	6	6	2.522	140
cg-Gal4>UAS-W-RNAi vs. cg-Gal4/W1118	96.05	90.97	5.082	4.667	6	6	1.54	140
10.98 % sucrose weight/volume
UAS-spen-RNAi/W1118 vs. cg-Gal4>UAS-spen-RNAi	100	100	0	4.667	6	6	0	140
UAS-spen-RNAi/W1118 vs. UAS-W-RNAi/W1118	100	100	0	4.667	6	6	0	140
UAS-spen-RNAi/W1118 vs. cg-Gal4>UAS-W-RNAi	100	100	0	4.667	6	6	0	140
UAS-spen-RNAi/W1118 vs. cg-Gal4/W1118	100	100	0	4.667	6	6	0	140
cg-Gal4>UAS-spen-RNAi vs. UAS-W-RNAi/W1118	100	100	0	4.667	6	6	0	140
cg-Gal4>UAS-spen-RNAi vs. cg-Gal4>UAS-W-RNAi	100	100	0	4.667	6	6	0	140
cg-Gal4>UAS-spen-RNAi vs. cg-Gal4/W1118	100	100	0	4.667	6	6	0	140
UAS-W-RNAi/W1118 vs. cg-Gal4>UAS-W-RNAi	100	100	0	4.667	6	6	0	140
UAS-W-RNAi/W1118 vs. cg-Gal4/W1118	100	100	0	4.667	6	6	0	140
cg-Gal4>UAS-W-RNAi vs. cg-Gal4/W1118	100	100	0	4.667	6	6	0	140
11.32 % sucrose weight/volume
UAS-spen-RNAi/W1118 vs. cg-Gal4>UAS-spen-RNAi	100	100	0	4.667	6	6	0	140
UAS-spen-RNAi/W1118 vs. UAS-W-RNAi/W1118	100	100	0	4.667	6	6	0	140
UAS-spen-RNAi/W1118 vs. cg-Gal4>UAS-W-RNAi	100	100	0	4.667	6	6	0	140
UAS-spen-RNAi/W1118 vs. cg-Gal4/W1118	100	100	0	4.667	6	6	0	140
cg-Gal4>UAS-spen-RNAi vs. UAS-W-RNAi/W1118	100	100	0	4.667	6	6	0	140
cg-Gal4>UAS-spen-RNAi vs. cg-Gal4>UAS-W-RNAi	100	100	0	4.667	6	6	0	140
cg-Gal4>UAS-spen-RNAi vs. cg-Gal4/W1118	100	100	0	4.667	6	6	0	140
UAS-W-RNAi/W1118 vs. cg-Gal4>UAS-W-RNAi	100	100	0	4.667	6	6	0	140
UAS-W-RNAi/W1118 vs. cg-Gal4/W1118	100	100	0	4.667	6	6	0	140
cg-Gal4>UAS-W-RNAi vs. cg-Gal4/W1118	100	100	0	4.667	6	6	0	140

## Sheet: CTRL-KD vs Spen-KD HSD Buoyancy
Within each row, compare columns (simple effects within rows)
Number of families	7
Number of comparisons per family	10
Alpha	0.05
Tukey's multiple comparisons test	Mean Diff.	95.00% CI of diff.	Significant?	Summary	Adjusted P Value
8.78 % sucrose weight/volume
UAS-spen-RNAi/W1118 vs. cg-Gal4>UAS-spen-RNAi	-25.72	-37.63 to -13.81	Yes	****	<0.0001
UAS-spen-RNAi/W1118 vs. UAS-W-RNAi/W1118	-6.632	-18.54 to 5.280	No	ns	0.5392
UAS-spen-RNAi/W1118 vs. cg-Gal4>UAS-W-RNAi	-5.348	-17.26 to 6.563	No	ns	0.7275
UAS-spen-RNAi/W1118 vs. cg-Gal4/W1118	-11.65	-23.56 to 0.2632	No	ns	0.0586
cg-Gal4>UAS-spen-RNAi vs. UAS-W-RNAi/W1118	19.09	7.175 to 31.00	Yes	***	0.0002
cg-Gal4>UAS-spen-RNAi vs. cg-Gal4>UAS-W-RNAi	20.37	8.459 to 32.28	Yes	****	<0.0001
cg-Gal4>UAS-spen-RNAi vs. cg-Gal4/W1118	14.07	2.158 to 25.98	Yes	*	0.0118
UAS-W-RNAi/W1118 vs. cg-Gal4>UAS-W-RNAi	1.284	-10.63 to 13.20	No	ns	0.9983
UAS-W-RNAi/W1118 vs. cg-Gal4/W1118	-5.016	-16.93 to 6.895	No	ns	0.7719
cg-Gal4>UAS-W-RNAi vs. cg-Gal4/W1118	-6.3	-18.21 to 5.612	No	ns	0.589
9.3 % sucrose weight/volume
UAS-spen-RNAi/W1118 vs. cg-Gal4>UAS-spen-RNAi	-21.21	-33.13 to -9.303	Yes	****	<0.0001
UAS-spen-RNAi/W1118 vs. UAS-W-RNAi/W1118	-8.92	-20.83 to 2.992	No	ns	0.2392
UAS-spen-RNAi/W1118 vs. cg-Gal4>UAS-W-RNAi	14.57	2.654 to 26.48	Yes	**	0.0082
UAS-spen-RNAi/W1118 vs. cg-Gal4/W1118	2.473	-9.439 to 14.38	No	ns	0.9787
cg-Gal4>UAS-spen-RNAi vs. UAS-W-RNAi/W1118	12.29	0.3830 to 24.21	Yes	*	0.0394
cg-Gal4>UAS-spen-RNAi vs. cg-Gal4>UAS-W-RNAi	35.78	23.87 to 47.69	Yes	****	<0.0001
cg-Gal4>UAS-spen-RNAi vs. cg-Gal4/W1118	23.69	11.78 to 35.60	Yes	****	<0.0001
UAS-W-RNAi/W1118 vs. cg-Gal4>UAS-W-RNAi	23.48	11.57 to 35.40	Yes	****	<0.0001
UAS-W-RNAi/W1118 vs. cg-Gal4/W1118	11.39	-0.5191 to 23.30	No	ns	0.0681
cg-Gal4>UAS-W-RNAi vs. cg-Gal4/W1118	-12.09	-24.00 to -0.1805	Yes	*	0.0447
9.78 % sucrose weight/volume
UAS-spen-RNAi/W1118 vs. cg-Gal4>UAS-spen-RNAi	-3.511	-15.42 to 8.401	No	ns	0.9258
UAS-spen-RNAi/W1118 vs. UAS-W-RNAi/W1118	-0.3713	-12.28 to 11.54	No	ns	>0.9999
UAS-spen-RNAi/W1118 vs. cg-Gal4>UAS-W-RNAi	12.04	0.1297 to 23.95	Yes	*	0.0462
UAS-spen-RNAi/W1118 vs. cg-Gal4/W1118	10.98	-0.9335 to 22.89	No	ns	0.0863
cg-Gal4>UAS-spen-RNAi vs. UAS-W-RNAi/W1118	3.139	-8.772 to 15.05	No	ns	0.9496
cg-Gal4>UAS-spen-RNAi vs. cg-Gal4>UAS-W-RNAi	15.55	3.640 to 27.46	Yes	**	0.0039
cg-Gal4>UAS-spen-RNAi vs. cg-Gal4/W1118	14.49	2.577 to 26.40	Yes	**	0.0087
UAS-W-RNAi/W1118 vs. cg-Gal4>UAS-W-RNAi	12.41	0.5010 to 24.32	Yes	*	0.0366
UAS-W-RNAi/W1118 vs. cg-Gal4/W1118	11.35	-0.5622 to 23.26	No	ns	0.0698
cg-Gal4>UAS-W-RNAi vs. cg-Gal4/W1118	-1.063	-12.97 to 10.85	No	ns	0.9992
10.2 % sucrose weight/volume
UAS-spen-RNAi/W1118 vs. cg-Gal4>UAS-spen-RNAi	0	-11.91 to 11.91	No	ns	>0.9999
UAS-spen-RNAi/W1118 vs. UAS-W-RNAi/W1118	1.538	-10.37 to 13.45	No	ns	0.9965
UAS-spen-RNAi/W1118 vs. cg-Gal4>UAS-W-RNAi	1.389	-10.52 to 13.30	No	ns	0.9976
UAS-spen-RNAi/W1118 vs. cg-Gal4/W1118	4.474	-7.438 to 16.39	No	ns	0.8373
cg-Gal4>UAS-spen-RNAi vs. UAS-W-RNAi/W1118	1.538	-10.37 to 13.45	No	ns	0.9965
cg-Gal4>UAS-spen-RNAi vs. cg-Gal4>UAS-W-RNAi	1.389	-10.52 to 13.30	No	ns	0.9976
cg-Gal4>UAS-spen-RNAi vs. cg-Gal4/W1118	4.474	-7.438 to 16.39	No	ns	0.8373
UAS-W-RNAi/W1118 vs. cg-Gal4>UAS-W-RNAi	-0.1488	-12.06 to 11.76	No	ns	>0.9999
UAS-W-RNAi/W1118 vs. cg-Gal4/W1118	2.936	-8.975 to 14.85	No	ns	0.9602
cg-Gal4>UAS-W-RNAi vs. cg-Gal4/W1118	3.085	-8.827 to 15.00	No	ns	0.9526
10.61 % sucrose weight/volume
UAS-spen-RNAi/W1118 vs. cg-Gal4>UAS-spen-RNAi	0	-11.91 to 11.91	No	ns	>0.9999
UAS-spen-RNAi/W1118 vs. UAS-W-RNAi/W1118	0	-11.91 to 11.91	No	ns	>0.9999
UAS-spen-RNAi/W1118 vs. cg-Gal4>UAS-W-RNAi	0	-11.91 to 11.91	No	ns	>0.9999
UAS-spen-RNAi/W1118 vs. cg-Gal4/W1118	0	-11.91 to 11.91	No	ns	>0.9999
cg-Gal4>UAS-spen-RNAi vs. UAS-W-RNAi/W1118	0	-11.91 to 11.91	No	ns	>0.9999
cg-Gal4>UAS-spen-RNAi vs. cg-Gal4>UAS-W-RNAi	0	-11.91 to 11.91	No	ns	>0.9999
cg-Gal4>UAS-spen-RNAi vs. cg-Gal4/W1118	0	-11.91 to 11.91	No	ns	>0.9999
UAS-W-RNAi/W1118 vs. cg-Gal4>UAS-W-RNAi	0	-11.91 to 11.91	No	ns	>0.9999
UAS-W-RNAi/W1118 vs. cg-Gal4/W1118	0	-11.91 to 11.91	No	ns	>0.9999
cg-Gal4>UAS-W-RNAi vs. cg-Gal4/W1118	0	-11.91 to 11.91	No	ns	>0.9999
10.98 % sucrose weight/volume
UAS-spen-RNAi/W1118 vs. cg-Gal4>UAS-spen-RNAi	0	-11.91 to 11.91	No	ns	>0.9999
UAS-spen-RNAi/W1118 vs. UAS-W-RNAi/W1118	0	-11.91 to 11.91	No	ns	>0.9999
UAS-spen-RNAi/W1118 vs. cg-Gal4>UAS-W-RNAi	0	-11.91 to 11.91	No	ns	>0.9999
UAS-spen-RNAi/W1118 vs. cg-Gal4/W1118	0	-11.91 to 11.91	No	ns	>0.9999
cg-Gal4>UAS-spen-RNAi vs. UAS-W-RNAi/W1118	0	-11.91 to 11.91	No	ns	>0.9999
cg-Gal4>UAS-spen-RNAi vs. cg-Gal4>UAS-W-RNAi	0	-11.91 to 11.91	No	ns	>0.9999
cg-Gal4>UAS-spen-RNAi vs. cg-Gal4/W1118	0	-11.91 to 11.91	No	ns	>0.9999
UAS-W-RNAi/W1118 vs. cg-Gal4>UAS-W-RNAi	0	-11.91 to 11.91	No	ns	>0.9999
UAS-W-RNAi/W1118 vs. cg-Gal4/W1118	0	-11.91 to 11.91	No	ns	>0.9999
cg-Gal4>UAS-W-RNAi vs. cg-Gal4/W1118	0	-11.91 to 11.91	No	ns	>0.9999
11.32 % sucrose weight/volume
UAS-spen-RNAi/W1118 vs. cg-Gal4>UAS-spen-RNAi	0	-11.91 to 11.91	No	ns	>0.9999
UAS-spen-RNAi/W1118 vs. UAS-W-RNAi/W1118	0	-11.91 to 11.91	No	ns	>0.9999
UAS-spen-RNAi/W1118 vs. cg-Gal4>UAS-W-RNAi	0	-11.91 to 11.91	No	ns	>0.9999
UAS-spen-RNAi/W1118 vs. cg-Gal4/W1118	0	-11.91 to 11.91	No	ns	>0.9999
cg-Gal4>UAS-spen-RNAi vs. UAS-W-RNAi/W1118	0	-11.91 to 11.91	No	ns	>0.9999
cg-Gal4>UAS-spen-RNAi vs. cg-Gal4>UAS-W-RNAi	0	-11.91 to 11.91	No	ns	>0.9999
cg-Gal4>UAS-spen-RNAi vs. cg-Gal4/W1118	0	-11.91 to 11.91	No	ns	>0.9999
UAS-W-RNAi/W1118 vs. cg-Gal4>UAS-W-RNAi	0	-11.91 to 11.91	No	ns	>0.9999
UAS-W-RNAi/W1118 vs. cg-Gal4/W1118	0	-11.91 to 11.91	No	ns	>0.9999
cg-Gal4>UAS-W-RNAi vs. cg-Gal4/W1118	0	-11.91 to 11.91	No	ns	>0.9999
Test details	Mean 1	Mean 2	Mean Diff.	SE of diff.	N1	N2	q	DF
8.78 % sucrose weight/volume
UAS-spen-RNAi/W1118 vs. cg-Gal4>UAS-spen-RNAi	7.24	32.96	-25.72	4.31	6	6	8.439	140
UAS-spen-RNAi/W1118 vs. UAS-W-RNAi/W1118	7.24	13.87	-6.632	4.31	6	6	2.176	140
UAS-spen-RNAi/W1118 vs. cg-Gal4>UAS-W-RNAi	7.24	12.59	-5.348	4.31	6	6	1.755	140
UAS-spen-RNAi/W1118 vs. cg-Gal4/W1118	7.24	18.89	-11.65	4.31	6	6	3.822	140
cg-Gal4>UAS-spen-RNAi vs. UAS-W-RNAi/W1118	32.96	13.87	19.09	4.31	6	6	6.263	140
cg-Gal4>UAS-spen-RNAi vs. cg-Gal4>UAS-W-RNAi	32.96	12.59	20.37	4.31	6	6	6.684	140
cg-Gal4>UAS-spen-RNAi vs. cg-Gal4/W1118	32.96	18.89	14.07	4.31	6	6	4.617	140
UAS-W-RNAi/W1118 vs. cg-Gal4>UAS-W-RNAi	13.87	12.59	1.284	4.31	6	6	0.4212	140
UAS-W-RNAi/W1118 vs. cg-Gal4/W1118	13.87	18.89	-5.016	4.31	6	6	1.646	140
cg-Gal4>UAS-W-RNAi vs. cg-Gal4/W1118	12.59	18.89	-6.3	4.31	6	6	2.067	140
9.3 % sucrose weight/volume
UAS-spen-RNAi/W1118 vs. cg-Gal4>UAS-spen-RNAi	55.47	76.68	-21.21	4.31	6	6	6.961	140
UAS-spen-RNAi/W1118 vs. UAS-W-RNAi/W1118	55.47	64.39	-8.92	4.31	6	6	2.927	140
UAS-spen-RNAi/W1118 vs. cg-Gal4>UAS-W-RNAi	55.47	40.9	14.57	4.31	6	6	4.779	140
UAS-spen-RNAi/W1118 vs. cg-Gal4/W1118	55.47	52.99	2.473	4.31	6	6	0.8114	140
cg-Gal4>UAS-spen-RNAi vs. UAS-W-RNAi/W1118	76.68	64.39	12.29	4.31	6	6	4.034	140
cg-Gal4>UAS-spen-RNAi vs. cg-Gal4>UAS-W-RNAi	76.68	40.9	35.78	4.31	6	6	11.74	140
cg-Gal4>UAS-spen-RNAi vs. cg-Gal4/W1118	76.68	52.99	23.69	4.31	6	6	7.772	140
UAS-W-RNAi/W1118 vs. cg-Gal4>UAS-W-RNAi	64.39	40.9	23.48	4.31	6	6	7.706	140
UAS-W-RNAi/W1118 vs. cg-Gal4/W1118	64.39	52.99	11.39	4.31	6	6	3.738	140
cg-Gal4>UAS-W-RNAi vs. cg-Gal4/W1118	40.9	52.99	-12.09	4.31	6	6	3.968	140
9.78 % sucrose weight/volume
UAS-spen-RNAi/W1118 vs. cg-Gal4>UAS-spen-RNAi	94.2	97.71	-3.511	4.31	6	6	1.152	140
UAS-spen-RNAi/W1118 vs. UAS-W-RNAi/W1118	94.2	94.57	-0.3713	4.31	6	6	0.1218	140
UAS-spen-RNAi/W1118 vs. cg-Gal4>UAS-W-RNAi	94.2	82.16	12.04	4.31	6	6	3.951	140
UAS-spen-RNAi/W1118 vs. cg-Gal4/W1118	94.2	83.22	10.98	4.31	6	6	3.602	140
cg-Gal4>UAS-spen-RNAi vs. UAS-W-RNAi/W1118	97.71	94.57	3.139	4.31	6	6	1.03	140
cg-Gal4>UAS-spen-RNAi vs. cg-Gal4>UAS-W-RNAi	97.71	82.16	15.55	4.31	6	6	5.103	140
cg-Gal4>UAS-spen-RNAi vs. cg-Gal4/W1118	97.71	83.22	14.49	4.31	6	6	4.754	140
UAS-W-RNAi/W1118 vs. cg-Gal4>UAS-W-RNAi	94.57	82.16	12.41	4.31	6	6	4.073	140
UAS-W-RNAi/W1118 vs. cg-Gal4/W1118	94.57	83.22	11.35	4.31	6	6	3.724	140
cg-Gal4>UAS-W-RNAi vs. cg-Gal4/W1118	82.16	83.22	-1.063	4.31	6	6	0.3489	140
10.2 % sucrose weight/volume
UAS-spen-RNAi/W1118 vs. cg-Gal4>UAS-spen-RNAi	100	100	0	4.31	6	6	0	140
UAS-spen-RNAi/W1118 vs. UAS-W-RNAi/W1118	100	98.46	1.538	4.31	6	6	0.5045	140
UAS-spen-RNAi/W1118 vs. cg-Gal4>UAS-W-RNAi	100	98.61	1.389	4.31	6	6	0.4557	140
UAS-spen-RNAi/W1118 vs. cg-Gal4/W1118	100	95.53	4.474	4.31	6	6	1.468	140
cg-Gal4>UAS-spen-RNAi vs. UAS-W-RNAi/W1118	100	98.46	1.538	4.31	6	6	0.5045	140
cg-Gal4>UAS-spen-RNAi vs. cg-Gal4>UAS-W-RNAi	100	98.61	1.389	4.31	6	6	0.4557	140
cg-Gal4>UAS-spen-RNAi vs. cg-Gal4/W1118	100	95.53	4.474	4.31	6	6	1.468	140
UAS-W-RNAi/W1118 vs. cg-Gal4>UAS-W-RNAi	98.46	98.61	-0.1488	4.31	6	6	0.04883	140
UAS-W-RNAi/W1118 vs. cg-Gal4/W1118	98.46	95.53	2.936	4.31	6	6	0.9634	140
cg-Gal4>UAS-W-RNAi vs. cg-Gal4/W1118	98.61	95.53	3.085	4.31	6	6	1.012	140
10.61 % sucrose weight/volume
UAS-spen-RNAi/W1118 vs. cg-Gal4>UAS-spen-RNAi	100	100	0	4.31	6	6	0	140
UAS-spen-RNAi/W1118 vs. UAS-W-RNAi/W1118	100	100	0	4.31	6	6	0	140
UAS-spen-RNAi/W1118 vs. cg-Gal4>UAS-W-RNAi	100	100	0	4.31	6	6	0	140
UAS-spen-RNAi/W1118 vs. cg-Gal4/W1118	100	100	0	4.31	6	6	0	140
cg-Gal4>UAS-spen-RNAi vs. UAS-W-RNAi/W1118	100	100	0	4.31	6	6	0	140
cg-Gal4>UAS-spen-RNAi vs. cg-Gal4>UAS-W-RNAi	100	100	0	4.31	6	6	0	140
cg-Gal4>UAS-spen-RNAi vs. cg-Gal4/W1118	100	100	0	4.31	6	6	0	140
UAS-W-RNAi/W1118 vs. cg-Gal4>UAS-W-RNAi	100	100	0	4.31	6	6	0	140
UAS-W-RNAi/W1118 vs. cg-Gal4/W1118	100	100	0	4.31	6	6	0	140
cg-Gal4>UAS-W-RNAi vs. cg-Gal4/W1118	100	100	0	4.31	6	6	0	140
10.98 % sucrose weight/volume
UAS-spen-RNAi/W1118 vs. cg-Gal4>UAS-spen-RNAi	100	100	0	4.31	6	6	0	140
UAS-spen-RNAi/W1118 vs. UAS-W-RNAi/W1118	100	100	0	4.31	6	6	0	140
UAS-spen-RNAi/W1118 vs. cg-Gal4>UAS-W-RNAi	100	100	0	4.31	6	6	0	140
UAS-spen-RNAi/W1118 vs. cg-Gal4/W1118	100	100	0	4.31	6	6	0	140
cg-Gal4>UAS-spen-RNAi vs. UAS-W-RNAi/W1118	100	100	0	4.31	6	6	0	140
cg-Gal4>UAS-spen-RNAi vs. cg-Gal4>UAS-W-RNAi	100	100	0	4.31	6	6	0	140
cg-Gal4>UAS-spen-RNAi vs. cg-Gal4/W1118	100	100	0	4.31	6	6	0	140
UAS-W-RNAi/W1118 vs. cg-Gal4>UAS-W-RNAi	100	100	0	4.31	6	6	0	140
UAS-W-RNAi/W1118 vs. cg-Gal4/W1118	100	100	0	4.31	6	6	0	140
cg-Gal4>UAS-W-RNAi vs. cg-Gal4/W1118	100	100	0	4.31	6	6	0	140
11.32 % sucrose weight/volume
UAS-spen-RNAi/W1118 vs. cg-Gal4>UAS-spen-RNAi	100	100	0	4.31	6	6	0	140
UAS-spen-RNAi/W1118 vs. UAS-W-RNAi/W1118	100	100	0	4.31	6	6	0	140
UAS-spen-RNAi/W1118 vs. cg-Gal4>UAS-W-RNAi	100	100	0	4.31	6	6	0	140
UAS-spen-RNAi/W1118 vs. cg-Gal4/W1118	100	100	0	4.31	6	6	0	140
cg-Gal4>UAS-spen-RNAi vs. UAS-W-RNAi/W1118	100	100	0	4.31	6	6	0	140
cg-Gal4>UAS-spen-RNAi vs. cg-Gal4>UAS-W-RNAi	100	100	0	4.31	6	6	0	140
cg-Gal4>UAS-spen-RNAi vs. cg-Gal4/W1118	100	100	0	4.31	6	6	0	140
UAS-W-RNAi/W1118 vs. cg-Gal4>UAS-W-RNAi	100	100	0	4.31	6	6	0	140
UAS-W-RNAi/W1118 vs. cg-Gal4/W1118	100	100	0	4.31	6	6	0	140
cg-Gal4>UAS-W-RNAi vs. cg-Gal4/W1118	100	100	0	4.31	6	6	0	140

## Sheet: CTRL-KD vs Spen-KD HFD Buoyancy
Within each row, compare columns (simple effects within rows)
Number of families	7
Number of comparisons per family	10
Alpha	0.05
Tukey's multiple comparisons test	Mean Diff.	95.00% CI of diff.	Significant?	Summary	Adjusted P Value
8.78 % sucrose weight/volume
UAS-spen-RNAi/W1118 vs. cg-Gal4>UAS-spen-RNAi	-46.34	-58.64 to -34.04	Yes	****	<0.0001
UAS-spen-RNAi/W1118 vs. UAS-W-RNAi/W1118	-8.848	-21.15 to 3.450	No	ns	0.2771
UAS-spen-RNAi/W1118 vs. cg-Gal4>UAS-W-RNAi	9.573	-2.725 to 21.87	No	ns	0.2047
UAS-spen-RNAi/W1118 vs. cg-Gal4/W1118	-3.114	-15.41 to 9.185	No	ns	0.9562
cg-Gal4>UAS-spen-RNAi vs. UAS-W-RNAi/W1118	37.49	25.19 to 49.79	Yes	****	<0.0001
cg-Gal4>UAS-spen-RNAi vs. cg-Gal4>UAS-W-RNAi	55.91	43.61 to 68.21	Yes	****	<0.0001
cg-Gal4>UAS-spen-RNAi vs. cg-Gal4/W1118	43.22	30.93 to 55.52	Yes	****	<0.0001
UAS-W-RNAi/W1118 vs. cg-Gal4>UAS-W-RNAi	18.42	6.123 to 30.72	Yes	***	0.0006
UAS-W-RNAi/W1118 vs. cg-Gal4/W1118	5.735	-6.564 to 18.03	No	ns	0.6986
cg-Gal4>UAS-W-RNAi vs. cg-Gal4/W1118	-12.69	-24.99 to -0.3886	Yes	*	0.0396
9.3 % sucrose weight/volume
UAS-spen-RNAi/W1118 vs. cg-Gal4>UAS-spen-RNAi	-10.84	-23.14 to 1.462	No	ns	0.1121
UAS-spen-RNAi/W1118 vs. UAS-W-RNAi/W1118	2.006	-10.29 to 14.30	No	ns	0.9914
UAS-spen-RNAi/W1118 vs. cg-Gal4>UAS-W-RNAi	24.06	11.76 to 36.36	Yes	****	<0.0001
UAS-spen-RNAi/W1118 vs. cg-Gal4/W1118	12.16	-0.1414 to 24.46	No	ns	0.0543
cg-Gal4>UAS-spen-RNAi vs. UAS-W-RNAi/W1118	12.84	0.5439 to 25.14	Yes	*	0.036
cg-Gal4>UAS-spen-RNAi vs. cg-Gal4>UAS-W-RNAi	34.89	22.60 to 47.19	Yes	****	<0.0001
cg-Gal4>UAS-spen-RNAi vs. cg-Gal4/W1118	22.99	10.70 to 35.29	Yes	****	<0.0001
UAS-W-RNAi/W1118 vs. cg-Gal4>UAS-W-RNAi	22.05	9.754 to 34.35	Yes	****	<0.0001
UAS-W-RNAi/W1118 vs. cg-Gal4/W1118	10.15	-2.147 to 22.45	No	ns	0.1572
cg-Gal4>UAS-W-RNAi vs. cg-Gal4/W1118	-11.9	-24.20 to 0.3975	No	ns	0.063
9.78 % sucrose weight/volume
UAS-spen-RNAi/W1118 vs. cg-Gal4>UAS-spen-RNAi	-0.7176	-13.02 to 11.58	No	ns	0.9998
UAS-spen-RNAi/W1118 vs. UAS-W-RNAi/W1118	0.643	-11.66 to 12.94	No	ns	>0.9999
UAS-spen-RNAi/W1118 vs. cg-Gal4>UAS-W-RNAi	6.83	-5.468 to 19.13	No	ns	0.5417
UAS-spen-RNAi/W1118 vs. cg-Gal4/W1118	5.667	-6.631 to 17.97	No	ns	0.7078
cg-Gal4>UAS-spen-RNAi vs. UAS-W-RNAi/W1118	1.361	-10.94 to 13.66	No	ns	0.9981
cg-Gal4>UAS-spen-RNAi vs. cg-Gal4>UAS-W-RNAi	7.548	-4.751 to 19.85	No	ns	0.4397
cg-Gal4>UAS-spen-RNAi vs. cg-Gal4/W1118	6.385	-5.913 to 18.68	No	ns	0.6063
UAS-W-RNAi/W1118 vs. cg-Gal4>UAS-W-RNAi	6.187	-6.111 to 18.49	No	ns	0.6348
UAS-W-RNAi/W1118 vs. cg-Gal4/W1118	5.025	-7.274 to 17.32	No	ns	0.7909
cg-Gal4>UAS-W-RNAi vs. cg-Gal4/W1118	-1.163	-13.46 to 11.14	No	ns	0.999
10.2 % sucrose weight/volume
UAS-spen-RNAi/W1118 vs. cg-Gal4>UAS-spen-RNAi	0	-12.30 to 12.30	No	ns	>0.9999
UAS-spen-RNAi/W1118 vs. UAS-W-RNAi/W1118	0	-12.30 to 12.30	No	ns	>0.9999
UAS-spen-RNAi/W1118 vs. cg-Gal4>UAS-W-RNAi	1.136	-11.16 to 13.43	No	ns	0.9991
UAS-spen-RNAi/W1118 vs. cg-Gal4/W1118	0	-12.30 to 12.30	No	ns	>0.9999
cg-Gal4>UAS-spen-RNAi vs. UAS-W-RNAi/W1118	0	-12.30 to 12.30	No	ns	>0.9999
cg-Gal4>UAS-spen-RNAi vs. cg-Gal4>UAS-W-RNAi	1.136	-11.16 to 13.43	No	ns	0.9991
cg-Gal4>UAS-spen-RNAi vs. cg-Gal4/W1118	0	-12.30 to 12.30	No	ns	>0.9999
UAS-W-RNAi/W1118 vs. cg-Gal4>UAS-W-RNAi	1.136	-11.16 to 13.43	No	ns	0.9991
UAS-W-RNAi/W1118 vs. cg-Gal4/W1118	0	-12.30 to 12.30	No	ns	>0.9999
cg-Gal4>UAS-W-RNAi vs. cg-Gal4/W1118	-1.136	-13.43 to 11.16	No	ns	0.9991
10.61 % sucrose weight/volume
UAS-spen-RNAi/W1118 vs. cg-Gal4>UAS-spen-RNAi	0	-12.30 to 12.30	No	ns	>0.9999
UAS-spen-RNAi/W1118 vs. UAS-W-RNAi/W1118	0	-12.30 to 12.30	No	ns	>0.9999
UAS-spen-RNAi/W1118 vs. cg-Gal4>UAS-W-RNAi	0	-12.30 to 12.30	No	ns	>0.9999
UAS-spen-RNAi/W1118 vs. cg-Gal4/W1118	0	-12.30 to 12.30	No	ns	>0.9999
cg-Gal4>UAS-spen-RNAi vs. UAS-W-RNAi/W1118	0	-12.30 to 12.30	No	ns	>0.9999
cg-Gal4>UAS-spen-RNAi vs. cg-Gal4>UAS-W-RNAi	0	-12.30 to 12.30	No	ns	>0.9999
cg-Gal4>UAS-spen-RNAi vs. cg-Gal4/W1118	0	-12.30 to 12.30	No	ns	>0.9999
UAS-W-RNAi/W1118 vs. cg-Gal4>UAS-W-RNAi	0	-12.30 to 12.30	No	ns	>0.9999
UAS-W-RNAi/W1118 vs. cg-Gal4/W1118	0	-12.30 to 12.30	No	ns	>0.9999
cg-Gal4>UAS-W-RNAi vs. cg-Gal4/W1118	0	-12.30 to 12.30	No	ns	>0.9999
10.98 % sucrose weight/volume
UAS-spen-RNAi/W1118 vs. cg-Gal4>UAS-spen-RNAi	0	-12.30 to 12.30	No	ns	>0.9999
UAS-spen-RNAi/W1118 vs. UAS-W-RNAi/W1118	0	-12.30 to 12.30	No	ns	>0.9999
UAS-spen-RNAi/W1118 vs. cg-Gal4>UAS-W-RNAi	0	-12.30 to 12.30	No	ns	>0.9999
UAS-spen-RNAi/W1118 vs. cg-Gal4/W1118	0	-12.30 to 12.30	No	ns	>0.9999
cg-Gal4>UAS-spen-RNAi vs. UAS-W-RNAi/W1118	0	-12.30 to 12.30	No	ns	>0.9999
cg-Gal4>UAS-spen-RNAi vs. cg-Gal4>UAS-W-RNAi	0	-12.30 to 12.30	No	ns	>0.9999
cg-Gal4>UAS-spen-RNAi vs. cg-Gal4/W1118	0	-12.30 to 12.30	No	ns	>0.9999
UAS-W-RNAi/W1118 vs. cg-Gal4>UAS-W-RNAi	0	-12.30 to 12.30	No	ns	>0.9999
UAS-W-RNAi/W1118 vs. cg-Gal4/W1118	0	-12.30 to 12.30	No	ns	>0.9999
cg-Gal4>UAS-W-RNAi vs. cg-Gal4/W1118	0	-12.30 to 12.30	No	ns	>0.9999
11.32 % sucrose weight/volume
UAS-spen-RNAi/W1118 vs. cg-Gal4>UAS-spen-RNAi	0	-12.30 to 12.30	No	ns	>0.9999
UAS-spen-RNAi/W1118 vs. UAS-W-RNAi/W1118	0	-12.30 to 12.30	No	ns	>0.9999
UAS-spen-RNAi/W1118 vs. cg-Gal4>UAS-W-RNAi	0	-12.30 to 12.30	No	ns	>0.9999
UAS-spen-RNAi/W1118 vs. cg-Gal4/W1118	0	-12.30 to 12.30	No	ns	>0.9999
cg-Gal4>UAS-spen-RNAi vs. UAS-W-RNAi/W1118	0	-12.30 to 12.30	No	ns	>0.9999
cg-Gal4>UAS-spen-RNAi vs. cg-Gal4>UAS-W-RNAi	0	-12.30 to 12.30	No	ns	>0.9999
cg-Gal4>UAS-spen-RNAi vs. cg-Gal4/W1118	0	-12.30 to 12.30	No	ns	>0.9999
UAS-W-RNAi/W1118 vs. cg-Gal4>UAS-W-RNAi	0	-12.30 to 12.30	No	ns	>0.9999
UAS-W-RNAi/W1118 vs. cg-Gal4/W1118	0	-12.30 to 12.30	No	ns	>0.9999
cg-Gal4>UAS-W-RNAi vs. cg-Gal4/W1118	0	-12.30 to 12.30	No	ns	>0.9999
Test details	Mean 1	Mean 2	Mean Diff.	SE of diff.	N1	N2	q	DF
8.78 % sucrose weight/volume
UAS-spen-RNAi/W1118 vs. cg-Gal4>UAS-spen-RNAi	33.72	80.06	-46.34	4.45	6	6	14.73	140
UAS-spen-RNAi/W1118 vs. UAS-W-RNAi/W1118	33.72	42.57	-8.848	4.45	6	6	2.812	140
UAS-spen-RNAi/W1118 vs. cg-Gal4>UAS-W-RNAi	33.72	24.15	9.573	4.45	6	6	3.042	140
UAS-spen-RNAi/W1118 vs. cg-Gal4/W1118	33.72	36.83	-3.114	4.45	6	6	0.9896	140
cg-Gal4>UAS-spen-RNAi vs. UAS-W-RNAi/W1118	80.06	42.57	37.49	4.45	6	6	11.91	140
cg-Gal4>UAS-spen-RNAi vs. cg-Gal4>UAS-W-RNAi	80.06	24.15	55.91	4.45	6	6	17.77	140
cg-Gal4>UAS-spen-RNAi vs. cg-Gal4/W1118	80.06	36.83	43.22	4.45	6	6	13.74	140
UAS-W-RNAi/W1118 vs. cg-Gal4>UAS-W-RNAi	42.57	24.15	18.42	4.45	6	6	5.854	140
UAS-W-RNAi/W1118 vs. cg-Gal4/W1118	42.57	36.83	5.735	4.45	6	6	1.822	140
cg-Gal4>UAS-W-RNAi vs. cg-Gal4/W1118	24.15	36.83	-12.69	4.45	6	6	4.032	140
9.3 % sucrose weight/volume
UAS-spen-RNAi/W1118 vs. cg-Gal4>UAS-spen-RNAi	86.52	97.36	-10.84	4.45	6	6	3.444	140
UAS-spen-RNAi/W1118 vs. UAS-W-RNAi/W1118	86.52	84.52	2.006	4.45	6	6	0.6375	140
UAS-spen-RNAi/W1118 vs. cg-Gal4>UAS-W-RNAi	86.52	62.47	24.06	4.45	6	6	7.646	140
UAS-spen-RNAi/W1118 vs. cg-Gal4/W1118	86.52	74.37	12.16	4.45	6	6	3.863	140
cg-Gal4>UAS-spen-RNAi vs. UAS-W-RNAi/W1118	97.36	84.52	12.84	4.45	6	6	4.081	140
cg-Gal4>UAS-spen-RNAi vs. cg-Gal4>UAS-W-RNAi	97.36	62.47	34.89	4.45	6	6	11.09	140
cg-Gal4>UAS-spen-RNAi vs. cg-Gal4/W1118	97.36	74.37	22.99	4.45	6	6	7.307	140
UAS-W-RNAi/W1118 vs. cg-Gal4>UAS-W-RNAi	84.52	62.47	22.05	4.45	6	6	7.008	140
UAS-W-RNAi/W1118 vs. cg-Gal4/W1118	84.52	74.37	10.15	4.45	6	6	3.226	140
cg-Gal4>UAS-W-RNAi vs. cg-Gal4/W1118	62.47	74.37	-11.9	4.45	6	6	3.782	140
9.78 % sucrose weight/volume
UAS-spen-RNAi/W1118 vs. cg-Gal4>UAS-spen-RNAi	99.28	100	-0.7176	4.45	6	6	0.228	140
UAS-spen-RNAi/W1118 vs. UAS-W-RNAi/W1118	99.28	98.64	0.643	4.45	6	6	0.2043	140
UAS-spen-RNAi/W1118 vs. cg-Gal4>UAS-W-RNAi	99.28	92.45	6.83	4.45	6	6	2.171	140
UAS-spen-RNAi/W1118 vs. cg-Gal4/W1118	99.28	93.61	5.667	4.45	6	6	1.801	140
cg-Gal4>UAS-spen-RNAi vs. UAS-W-RNAi/W1118	100	98.64	1.361	4.45	6	6	0.4324	140
cg-Gal4>UAS-spen-RNAi vs. cg-Gal4>UAS-W-RNAi	100	92.45	7.548	4.45	6	6	2.399	140
cg-Gal4>UAS-spen-RNAi vs. cg-Gal4/W1118	100	93.61	6.385	4.45	6	6	2.029	140
UAS-W-RNAi/W1118 vs. cg-Gal4>UAS-W-RNAi	98.64	92.45	6.187	4.45	6	6	1.966	140
UAS-W-RNAi/W1118 vs. cg-Gal4/W1118	98.64	93.61	5.025	4.45	6	6	1.597	140
cg-Gal4>UAS-W-RNAi vs. cg-Gal4/W1118	92.45	93.61	-1.163	4.45	6	6	0.3695	140
10.2 % sucrose weight/volume
UAS-spen-RNAi/W1118 vs. cg-Gal4>UAS-spen-RNAi	100	100	0	4.45	6	6	0	140
UAS-spen-RNAi/W1118 vs. UAS-W-RNAi/W1118	100	100	0	4.45	6	6	0	140
UAS-spen-RNAi/W1118 vs. cg-Gal4>UAS-W-RNAi	100	98.86	1.136	4.45	6	6	0.3611	140
UAS-spen-RNAi/W1118 vs. cg-Gal4/W1118	100	100	0	4.45	6	6	0	140
cg-Gal4>UAS-spen-RNAi vs. UAS-W-RNAi/W1118	100	100	0	4.45	6	6	0	140
cg-Gal4>UAS-spen-RNAi vs. cg-Gal4>UAS-W-RNAi	100	98.86	1.136	4.45	6	6	0.3611	140
cg-Gal4>UAS-spen-RNAi vs. cg-Gal4/W1118	100	100	0	4.45	6	6	0	140
UAS-W-RNAi/W1118 vs. cg-Gal4>UAS-W-RNAi	100	98.86	1.136	4.45	6	6	0.3611	140
UAS-W-RNAi/W1118 vs. cg-Gal4/W1118	100	100	0	4.45	6	6	0	140
cg-Gal4>UAS-W-RNAi vs. cg-Gal4/W1118	98.86	100	-1.136	4.45	6	6	0.3611	140
10.61 % sucrose weight/volume
UAS-spen-RNAi/W1118 vs. cg-Gal4>UAS-spen-RNAi	100	100	0	4.45	6	6	0	140
UAS-spen-RNAi/W1118 vs. UAS-W-RNAi/W1118	100	100	0	4.45	6	6	0	140
UAS-spen-RNAi/W1118 vs. cg-Gal4>UAS-W-RNAi	100	100	0	4.45	6	6	0	140
UAS-spen-RNAi/W1118 vs. cg-Gal4/W1118	100	100	0	4.45	6	6	0	140
cg-Gal4>UAS-spen-RNAi vs. UAS-W-RNAi/W1118	100	100	0	4.45	6	6	0	140
cg-Gal4>UAS-spen-RNAi vs. cg-Gal4>UAS-W-RNAi	100	100	0	4.45	6	6	0	140
cg-Gal4>UAS-spen-RNAi vs. cg-Gal4/W1118	100	100	0	4.45	6	6	0	140
UAS-W-RNAi/W1118 vs. cg-Gal4>UAS-W-RNAi	100	100	0	4.45	6	6	0	140
UAS-W-RNAi/W1118 vs. cg-Gal4/W1118	100	100	0	4.45	6	6	0	140
cg-Gal4>UAS-W-RNAi vs. cg-Gal4/W1118	100	100	0	4.45	6	6	0	140
10.98 % sucrose weight/volume
UAS-spen-RNAi/W1118 vs. cg-Gal4>UAS-spen-RNAi	100	100	0	4.45	6	6	0	140
UAS-spen-RNAi/W1118 vs. UAS-W-RNAi/W1118	100	100	0	4.45	6	6	0	140
UAS-spen-RNAi/W1118 vs. cg-Gal4>UAS-W-RNAi	100	100	0	4.45	6	6	0	140
UAS-spen-RNAi/W1118 vs. cg-Gal4/W1118	100	100	0	4.45	6	6	0	140
cg-Gal4>UAS-spen-RNAi vs. UAS-W-RNAi/W1118	100	100	0	4.45	6	6	0	140
cg-Gal4>UAS-spen-RNAi vs. cg-Gal4>UAS-W-RNAi	100	100	0	4.45	6	6	0	140
cg-Gal4>UAS-spen-RNAi vs. cg-Gal4/W1118	100	100	0	4.45	6	6	0	140
UAS-W-RNAi/W1118 vs. cg-Gal4>UAS-W-RNAi	100	100	0	4.45	6	6	0	140
UAS-W-RNAi/W1118 vs. cg-Gal4/W1118	100	100	0	4.45	6	6	0	140
cg-Gal4>UAS-W-RNAi vs. cg-Gal4/W1118	100	100	0	4.45	6	6	0	140
11.32 % sucrose weight/volume
UAS-spen-RNAi/W1118 vs. cg-Gal4>UAS-spen-RNAi	100	100	0	4.45	6	6	0	140
UAS-spen-RNAi/W1118 vs. UAS-W-RNAi/W1118	100	100	0	4.45	6	6	0	140
UAS-spen-RNAi/W1118 vs. cg-Gal4>UAS-W-RNAi	100	100	0	4.45	6	6	0	140
UAS-spen-RNAi/W1118 vs. cg-Gal4/W1118	100	100	0	4.45	6	6	0	140
cg-Gal4>UAS-spen-RNAi vs. UAS-W-RNAi/W1118	100	100	0	4.45	6	6	0	140
cg-Gal4>UAS-spen-RNAi vs. cg-Gal4>UAS-W-RNAi	100	100	0	4.45	6	6	0	140
cg-Gal4>UAS-spen-RNAi vs. cg-Gal4/W1118	100	100	0	4.45	6	6	0	140
UAS-W-RNAi/W1118 vs. cg-Gal4>UAS-W-RNAi	100	100	0	4.45	6	6	0	140
UAS-W-RNAi/W1118 vs. cg-Gal4/W1118	100	100	0	4.45	6	6	0	140
cg-Gal4>UAS-W-RNAi vs. cg-Gal4/W1118	100	100	0	4.45	6	6	0	140

## Sheet: Spen-KD|MYD vs EXP Buoyancy
Within each row, compare columns (simple effects within rows)
Number of families	7
Number of comparisons per family	3
Alpha	0.05
Dunnett's multiple comparisons test	Mean Diff.	95.00% CI of diff.	Significant?	Summary	Adjusted P Value
8.78 % sucrose weight/volume
Spen-KD|MYD vs. Spen-KD|HYD	-5.532	-19.29 to 8.225	No	ns	0.6571
Spen-KD|MYD vs. Spen-KD|HSD	-17.31	-31.07 to -3.556	Yes	**	0.0093
Spen-KD|MYD vs. Spen-KD|HFD	-64.41	-78.17 to -50.65	Yes	****	<0.0001
9.3 % sucrose weight/volume
Spen-KD|MYD vs. Spen-KD|HYD	3.277	-10.48 to 17.03	No	ns	0.8964
Spen-KD|MYD vs. Spen-KD|HSD	-25.07	-38.83 to -11.31	Yes	****	<0.0001
Spen-KD|MYD vs. Spen-KD|HFD	-45.75	-59.51 to -31.99	Yes	****	<0.0001
9.78 % sucrose weight/volume
Spen-KD|MYD vs. Spen-KD|HYD	8.493	-5.264 to 22.25	No	ns	0.3274
Spen-KD|MYD vs. Spen-KD|HSD	-12.19	-25.94 to 1.570	No	ns	0.0948
Spen-KD|MYD vs. Spen-KD|HFD	-14.48	-28.23 to -0.7189	Yes	*	0.0365
10.2% sucrose weight/volume
Spen-KD|MYD vs. Spen-KD|HYD	5.93	-7.827 to 19.69	No	ns	0.609
Spen-KD|MYD vs. Spen-KD|HSD	-0.9804	-14.74 to 12.78	No	ns	0.9966
Spen-KD|MYD vs. Spen-KD|HFD	-0.9804	-14.74 to 12.78	No	ns	0.9966
10.61 % sucrose weight/volume
Spen-KD|MYD vs. Spen-KD|HYD	0	-13.76 to 13.76	No	ns	>0.9999
Spen-KD|MYD vs. Spen-KD|HSD	0	-13.76 to 13.76	No	ns	>0.9999
Spen-KD|MYD vs. Spen-KD|HFD	0	-13.76 to 13.76	No	ns	>0.9999
10.98 % sucrose weight/volume
Spen-KD|MYD vs. Spen-KD|HYD	0	-13.76 to 13.76	No	ns	>0.9999
Spen-KD|MYD vs. Spen-KD|HSD	0	-13.76 to 13.76	No	ns	>0.9999
Spen-KD|MYD vs. Spen-KD|HFD	0	-13.76 to 13.76	No	ns	>0.9999
11.32 % sucrose weight/volume
Spen-KD|MYD vs. Spen-KD|HYD	0	-13.76 to 13.76	No	ns	>0.9999
Spen-KD|MYD vs. Spen-KD|HSD	0	-13.76 to 13.76	No	ns	>0.9999
Spen-KD|MYD vs. Spen-KD|HFD	0	-13.76 to 13.76	No	ns	>0.9999
Test details	Mean 1	Mean 2	Mean Diff.	SE of diff.	N1	N2	q	DF
8.78 % sucrose weight/volume
Spen-KD|MYD vs. Spen-KD|HYD	15.65	21.18	-5.532	5.793	6	6	0.9551	140
Spen-KD|MYD vs. Spen-KD|HSD	15.65	32.96	-17.31	5.793	6	6	2.989	140
Spen-KD|MYD vs. Spen-KD|HFD	15.65	80.06	-64.41	5.793	6	6	11.12	140
9.3 % sucrose weight/volume
Spen-KD|MYD vs. Spen-KD|HYD	51.61	48.33	3.277	5.793	6	6	0.5657	140
Spen-KD|MYD vs. Spen-KD|HSD	51.61	76.68	-25.07	5.793	6	6	4.328	140
Spen-KD|MYD vs. Spen-KD|HFD	51.61	97.36	-45.75	5.793	6	6	7.898	140
9.78 % sucrose weight/volume
Spen-KD|MYD vs. Spen-KD|HYD	85.52	77.03	8.493	5.793	6	6	1.466	140
Spen-KD|MYD vs. Spen-KD|HSD	85.52	97.71	-12.19	5.793	6	6	2.104	140
Spen-KD|MYD vs. Spen-KD|HFD	85.52	100	-14.48	5.793	6	6	2.499	140
10.2 % sucrose weight/volume
Spen-KD|MYD vs. Spen-KD|HYD	99.02	93.09	5.93	5.793	6	6	1.024	140
Spen-KD|MYD vs. Spen-KD|HSD	99.02	100	-0.9804	5.793	6	6	0.1692	140
Spen-KD|MYD vs. Spen-KD|HFD	99.02	100	-0.9804	5.793	6	6	0.1692	140
10.61 % sucrose weight/volume
Spen-KD|MYD vs. Spen-KD|HYD	100	100	0	5.793	6	6	0	140
Spen-KD|MYD vs. Spen-KD|HSD	100	100	0	5.793	6	6	0	140
Spen-KD|MYD vs. Spen-KD|HFD	100	100	0	5.793	6	6	0	140
10.98 % sucrose weight/volume
Spen-KD|MYD vs. Spen-KD|HYD	100	100	0	5.793	6	6	0	140
Spen-KD|MYD vs. Spen-KD|HSD	100	100	0	5.793	6	6	0	140
Spen-KD|MYD vs. Spen-KD|HFD	100	100	0	5.793	6	6	0	140
11.32 % sucrose weight/volume
Spen-KD|MYD vs. Spen-KD|HYD	100	100	0	5.793	6	6	0	140
Spen-KD|MYD vs. Spen-KD|HSD	100	100	0	5.793	6	6	0	140
Spen-KD|MYD vs. Spen-KD|HFD	100	100	0	5.793	6	6	0	140

## Sheet: CTRL-KD|MYD vs EXP Buoyancy
Within each row, compare columns (simple effects within rows)
Number of families	7
Number of comparisons per family	3
Alpha	0.05
Dunnett's multiple comparisons test	Mean Diff.	95.00% CI of diff.	Significant?	Summary	Adjusted P Value
8.78 % sucrose weight/volume
CTRL-KD|MYD vs. CTRL-KD|HYD	-0.08639	-16.40 to 16.23	No	ns	>0.9999
CTRL-KD|MYD vs. CTRL-KD|HSD	-8.407	-24.72 to 7.907	No	ns	0.4724
CTRL-KD|MYD vs. CTRL-KD|HFD	-19.96	-36.28 to -3.650	Yes	*	0.0118
9.3 % sucrose weight/volume
CTRL-KD|MYD vs. CTRL-KD|HYD	-8.841	-25.15 to 7.473	No	ns	0.4319
CTRL-KD|MYD vs. CTRL-KD|HSD	-22.48	-38.79 to -6.167	Yes	**	0.0038
CTRL-KD|MYD vs. CTRL-KD|HFD	-44.04	-60.36 to -27.73	Yes	****	<0.0001
9.78 % sucrose weight/volume
CTRL-KD|MYD vs. CTRL-KD|HYD	-3.742	-20.06 to 12.57	No	ns	0.906
CTRL-KD|MYD vs. CTRL-KD|HSD	-33.81	-50.13 to -17.50	Yes	****	<0.0001
CTRL-KD|MYD vs. CTRL-KD|HFD	-44.1	-60.42 to -27.79	Yes	****	<0.0001
10.2 % sucrose weight/volume
CTRL-KD|MYD vs. CTRL-KD|HYD	3.791	-12.52 to 20.11	No	ns	0.9028
CTRL-KD|MYD vs. CTRL-KD|HSD	-15.06	-31.38 to 1.249	No	ns	0.0774
CTRL-KD|MYD vs. CTRL-KD|HFD	-15.32	-31.63 to 0.9966	No	ns	0.071
10.61 % sucrose weight/volume
CTRL-KD|MYD vs. CTRL-KD|HYD	1.159	-15.16 to 17.47	No	ns	0.9966
CTRL-KD|MYD vs. CTRL-KD|HSD	-2.793	-19.11 to 13.52	No	ns	0.9571
CTRL-KD|MYD vs. CTRL-KD|HFD	-2.793	-19.11 to 13.52	No	ns	0.9571
10.98 % sucrose weight/volume
CTRL-KD|MYD vs. CTRL-KD|HYD	-0.3472	-16.66 to 15.97	No	ns	>0.9999
CTRL-KD|MYD vs. CTRL-KD|HSD	-0.3472	-16.66 to 15.97	No	ns	>0.9999
CTRL-KD|MYD vs. CTRL-KD|HFD	-0.3472	-16.66 to 15.97	No	ns	>0.9999
11.32 % sucrose weight/volume
CTRL-KD|MYD vs. CTRL-KD|HYD	0	-16.31 to 16.31	No	ns	>0.9999
CTRL-KD|MYD vs. CTRL-KD|HSD	0	-16.31 to 16.31	No	ns	>0.9999
CTRL-KD|MYD vs. CTRL-KD|HFD	0	-16.31 to 16.31	No	ns	>0.9999
Test details	Mean 1	Mean 2	Mean Diff.	SE of diff.	N1	N2	q	DF
8.78 % sucrose weight/volume
CTRL-KD|MYD vs. CTRL-KD|HYD	4.182	4.268	-0.08639	6.869	6	6	0.01258	140
CTRL-KD|MYD vs. CTRL-KD|HSD	4.182	12.59	-8.407	6.869	6	6	1.224	140
CTRL-KD|MYD vs. CTRL-KD|HFD	4.182	24.15	-19.96	6.869	6	6	2.906	140
9.3 % sucrose weight/volume
CTRL-KD|MYD vs. CTRL-KD|HYD	18.42	27.26	-8.841	6.869	6	6	1.287	140
CTRL-KD|MYD vs. CTRL-KD|HSD	18.42	40.9	-22.48	6.869	6	6	3.273	140
CTRL-KD|MYD vs. CTRL-KD|HFD	18.42	62.47	-44.04	6.869	6	6	6.412	140
9.78 % sucrose weight/volume
CTRL-KD|MYD vs. CTRL-KD|HYD	48.35	52.09	-3.742	6.869	6	6	0.5447	140
CTRL-KD|MYD vs. CTRL-KD|HSD	48.35	82.16	-33.81	6.869	6	6	4.922	140
CTRL-KD|MYD vs. CTRL-KD|HFD	48.35	92.45	-44.1	6.869	6	6	6.421	140
10.2 % sucrose weight/volume
CTRL-KD|MYD vs. CTRL-KD|HYD	83.55	79.75	3.791	6.869	6	6	0.5519	140
CTRL-KD|MYD vs. CTRL-KD|HSD	83.55	98.61	-15.06	6.869	6	6	2.193	140
CTRL-KD|MYD vs. CTRL-KD|HFD	83.55	98.86	-15.32	6.869	6	6	2.23	140
10.61 % sucrose weight/volume
CTRL-KD|MYD vs. CTRL-KD|HYD	97.21	96.05	1.159	6.869	6	6	0.1687	140
CTRL-KD|MYD vs. CTRL-KD|HSD	97.21	100	-2.793	6.869	6	6	0.4065	140
CTRL-KD|MYD vs. CTRL-KD|HFD	97.21	100	-2.793	6.869	6	6	0.4065	140
10.98 % sucrose weight/volume
CTRL-KD|MYD vs. CTRL-KD|HYD	99.65	100	-0.3472	6.869	6	6	0.05055	140
CTRL-KD|MYD vs. CTRL-KD|HSD	99.65	100	-0.3472	6.869	6	6	0.05055	140
CTRL-KD|MYD vs. CTRL-KD|HFD	99.65	100	-0.3472	6.869	6	6	0.05055	140
11.32 % sucrose weight/volume
CTRL-KD|MYD vs. CTRL-KD|HYD	100	100	0	6.869	6	6	0	140
CTRL-KD|MYD vs. CTRL-KD|HSD	100	100	0	6.869	6	6	0	140
CTRL-KD|MYD vs. CTRL-KD|HFD	100	100	0	6.869	6	6	0	140

## Sheet: Key
Genotype	Abbrivation
UAS-spen-RNAi	Spen-KD
UAS-W-RNAi	CTRL-KD
W1118	wildtype
cg-Gal4	FB-specific Gal4 driver line
Test Details
Two-way RM ANOVA	Matching: Across row
Assume sphericity?	Yes
Alpha	0.05
